# Supplementary material for: A TRIM insertion in the promoter of Ms2 causes male sterility in wheat
Source: PubMed Central journal article supplement (PMC5437302; doi:10.1038/ncomms15407), 2017-05-12
Supplement: ncomms15407-s1.pdf [file ncomms15407-s1.pdf]

## Supplementary Figures

### Supplementary Fig. 1

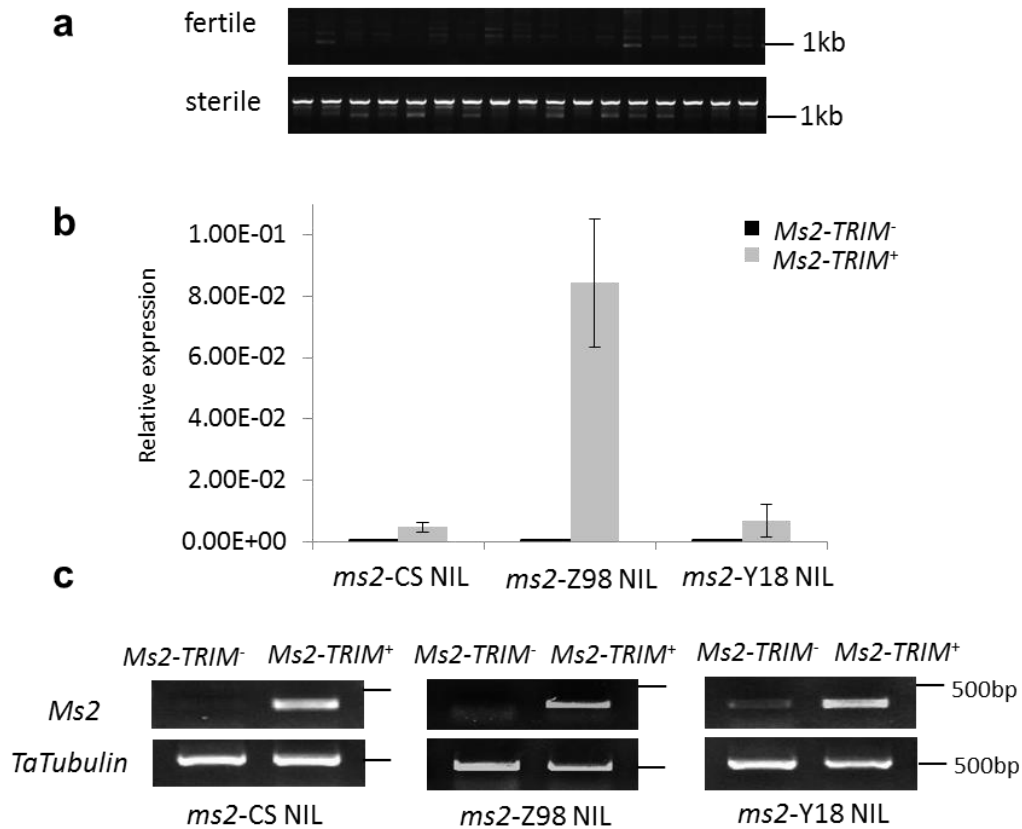

**Supplementary Figure 1 | *Ms2* polymorphism and expression pattern analysis.** (a) TRIM insertion status in 17 different *ms2* NILs detected by a PCR marker amplifying a portion of the TRIM element sequence and *Ms2* promoter. (b, c) *Ms2* expression in the anthers of WT (*Ms2-TRIM<sup>-</sup>*, fertile) and *ms2* mutant (*Ms2-TRIM<sup>+</sup>*, sterile) NIL plants in three genetic backgrounds (Chinese Spring, Zhengmai98, and Yumai18).

## Supplementary Fig. 2

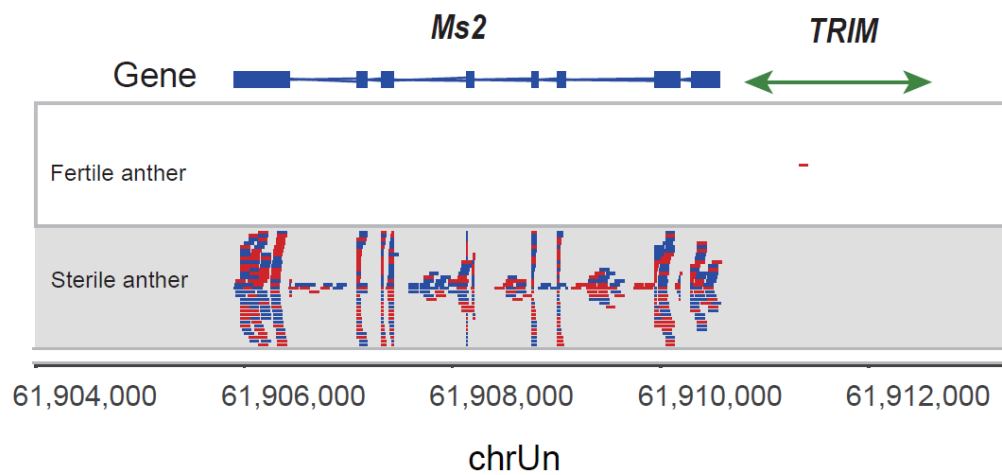

**Supplementary Figure 2 | The reads distribution across the TRIM element and gene no.14.** RNA-seq reads from the anther libraries from the *ms2* mutant and wild type wheat were mapped to an artificial wheat genome (Chinese Spring) with the *Ms2*-*TRIM* sequence inserted in front of gene no.14. The plot is adopted from SeqMonk, and the red and blue blocks represent reads mapped to forward mapping and reverse strands, separately.

### Supplementary Fig. 3

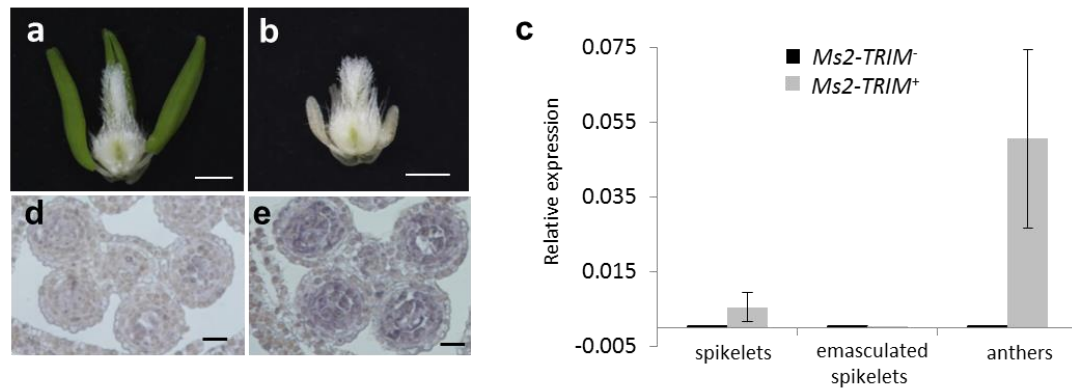

**Supplementary Figure 3 | The phenotype of Ai-Bai wheat and *Ms2* expression analysis.** Phenotypes of floral organs, following the removal of the palea and lemma, of tall-fertile progeny of Ai-Bai wheat ( $-Ms2-TRIM$ ) (a) and dwarf-sterile progeny of Ai-Bai wheat ( $Rht-D1c/Ms2-TRIM^+$ ) (b). (c) *Ms2* expression in three reproductive organs (spikelets, emasculated spikelets, anthers) of WT ( $Ms2-TRIM^-$ , fertile) and *ms2* mutant ( $Ms2-TRIM^+$ , sterile) plants in the Yanzhan1 genetic background. (d, e) *In situ* hybridization analysis (antisense probe) of *Ms2* in cross-sections of late prophase stage anthers from WT (d) and *ms2* mutant (e) plants.

Bars = 500  $\mu\text{m}$  in (a) and (b), and 50  $\mu\text{m}$  in (d) and (e).

## Supplementary Fig. 4

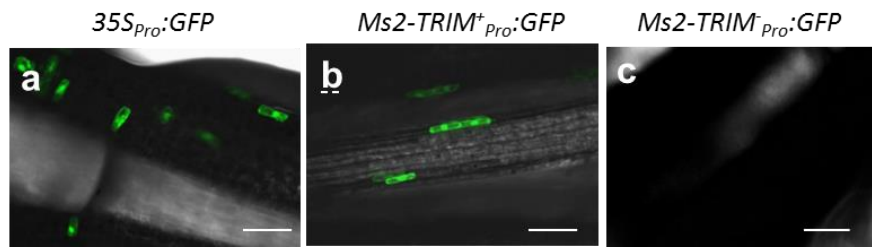

### Supplementary Figure 4 | Activity analysis of the *Ms2* promoter.

(a-c) GFP fluorescence in anther transiently expressing **35S<sub>Pro</sub>:GFP** (a), **Ms2-TRIM<sup>+</sup><sub>Pro</sub>:GFP** (b), and **Ms2-TRIM<sup>-</sup><sub>Pro</sub>:GFP** (c).

Bars = 100  $\mu$ m in (a) to (c).

## Supplementary Fig. 5

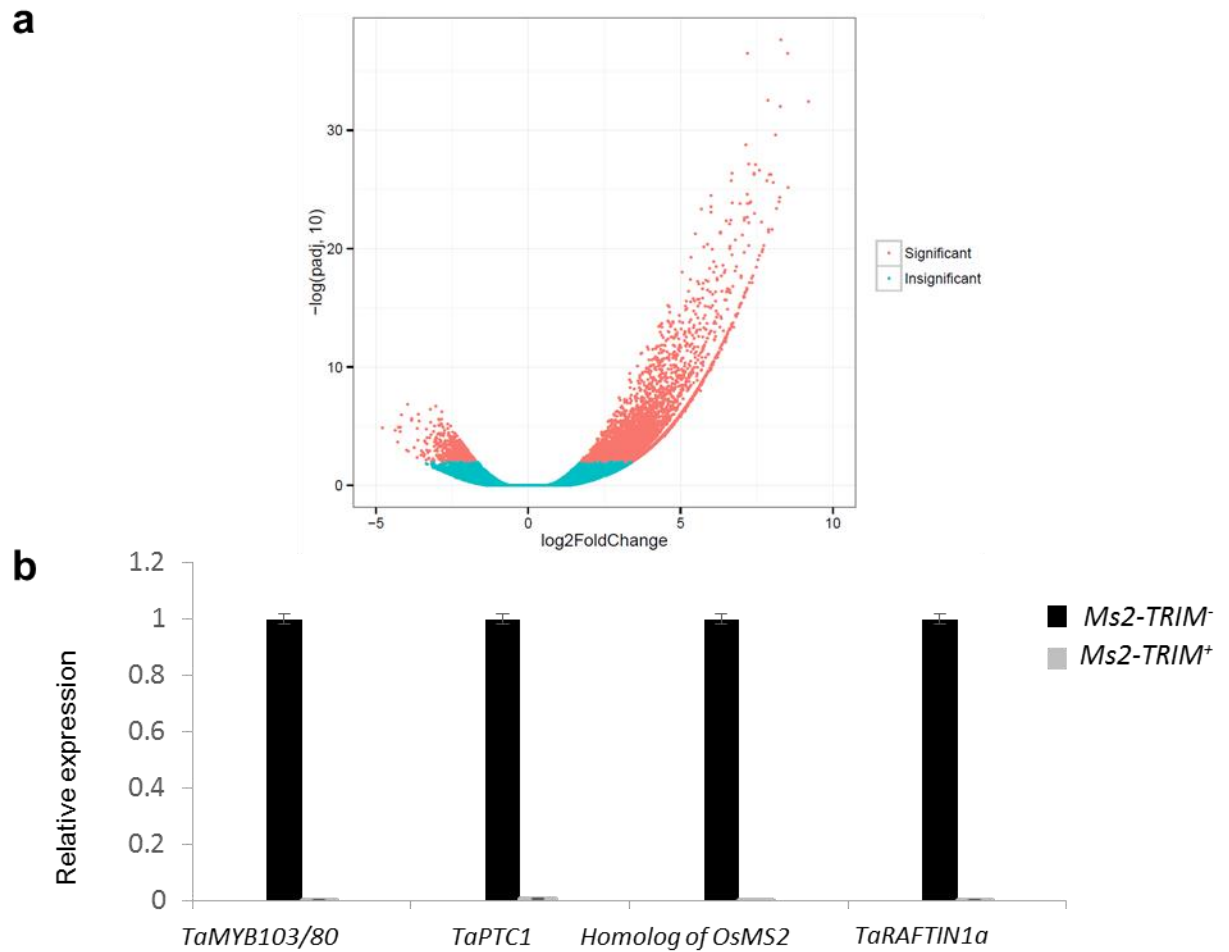

**Supplementary Figure 5 | Differentially expressed genes between *ms2* mutant vs. WT. (a)** Volcano plot of differentially expressed genes between *ms2* mutant vs. WT anthers. **(b)** The relative expression of *TaMYB80/MYB103*, *TaPTC1*, *Homolog of OsMS2* and *TaRAFTIN1* in WT and *ms2* mutant plants.

## Supplementary Fig. 6

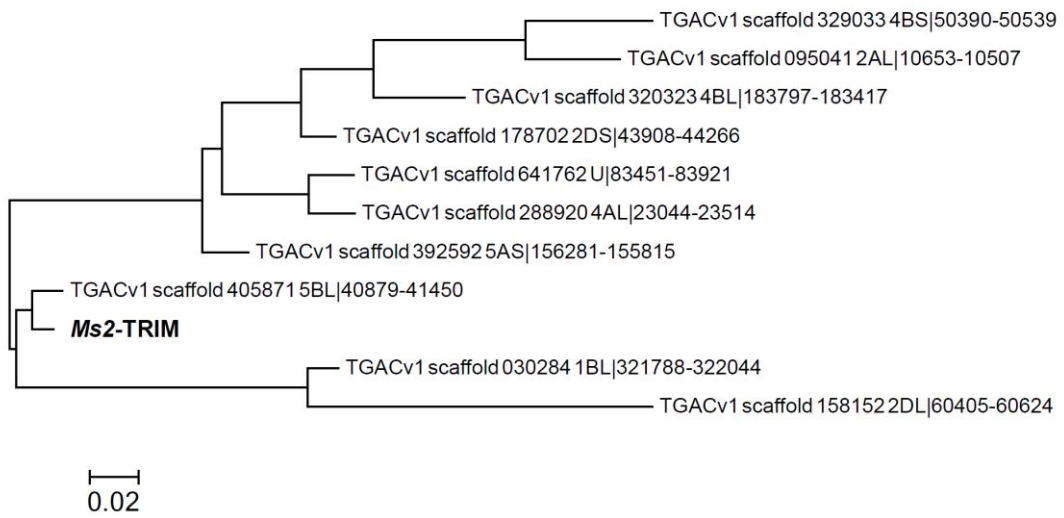

### Supplementary Figure 6 | Phylogenetic tree of *MS2-TRIM* and its hits in the hexaploid wheat genome (Chinese Spring).

Unrooted Neighbor-Joining phylogeny of the *Ms2* promoter TRIM based on the LTR region of the element in the wheat genome.

## Supplementary Fig. 7

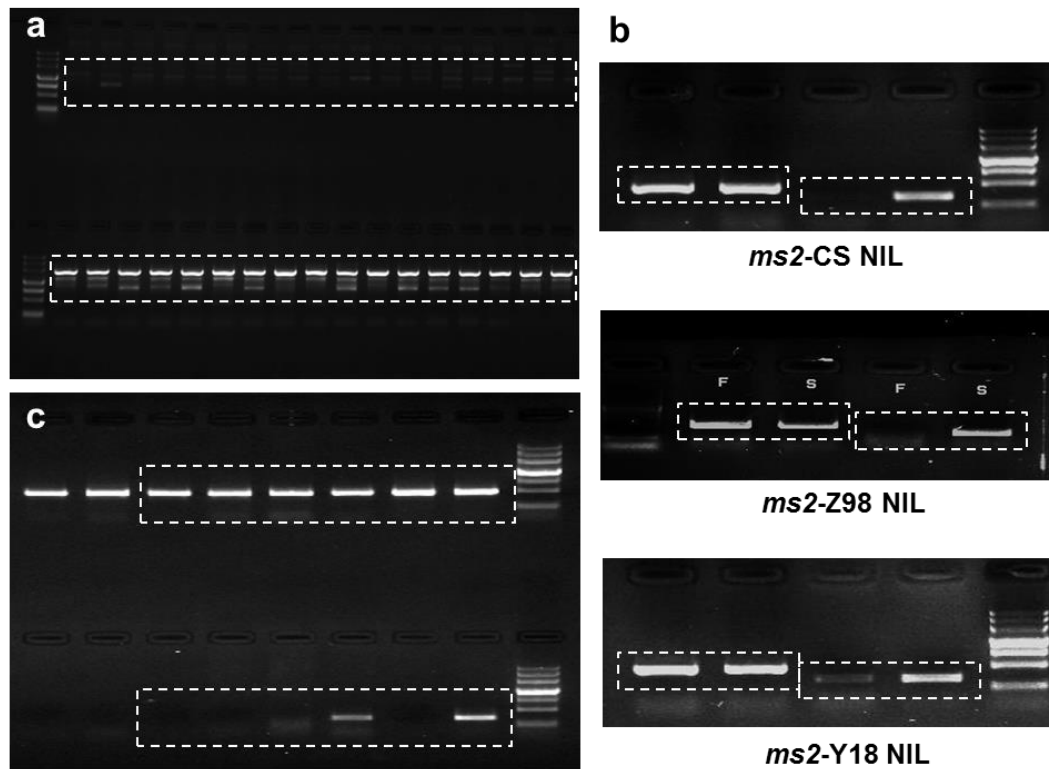

**Supplementary Figure 7 | Uncropped gel images.** (a) Uncropped gel image of supplementary figure 1a. (b) Uncropped gel images for RT-PCR in supplementary figure 1c. (c) Uncropped gel image for expression pattern analysis in figure 2a.

## Supplementary Tables

**Supplementary Table 1.** Estimates of nucleotide diversity and test of statistics for selection in *Ms2*

|                | n  | $\pi$ (per site) | $\theta$ (per site) | Tajima's D          | Fu and Li's D       |
|----------------|----|------------------|---------------------|---------------------|---------------------|
| Wild           | 30 | 0.00615          | 0.00585             | 0.176 <sup>\$</sup> | 0.381 <sup>\$</sup> |
| Landrace       | 28 | 0.00386          | 0.00233             | 2.026*              | 0.704 <sup>\$</sup> |
| Modern Variety | 26 | 0.00302          | 0.00238             | 0.847 <sup>\$</sup> | 0.720 <sup>\$</sup> |

Note :  $\pi$  : nucleotide diversity ,  $\theta$ : Watterson's estimator of genetic diversity, Statistical significance: \$ P>0.1, \* P <0.05



**Supplementary Table 2.** Materials were used to explore the nucleotide diversity of *Ms2*

| <b>Accession/Sample names</b> | <b>Species</b>                                 | <b>Abbr. Population Name</b> |
|-------------------------------|------------------------------------------------|------------------------------|
| TA1618                        | <i>Aegilops tauschii meyeri</i>                | wild diploid D               |
| TA2456                        | <i>Aegilops tauschii strangulata</i>           | wild diploid D               |
| TA2457                        | <i>Aegilops tauschii typica</i>                | wild diploid D               |
| TA2460                        | <i>Aegilops tauschii typica</i>                | wild diploid D               |
| TA2464                        | <i>Aegilops tauschii strangulata</i>           | wild diploid D               |
| TA2561                        | <i>Aegilops tauschii typica</i>                | wild diploid D               |
| TA1645                        | <i>Aegilops tauschii strangulata</i>           | wild diploid D               |
| TA1662                        | <i>Aegilops tauschii var.tauschii</i>          | wild diploid D               |
| TA2461                        | <i>Aegilops tauschii var.typica</i>            | wild diploid D               |
| TA2463                        | <i>Aegilops tauschii strangulata</i>           | wild diploid D               |
| TA2474                        | <i>Aegilops tauschii var.tauschii</i>          | wild diploid D               |
| TA2475                        | <i>Aegilops tauschii var.tauschii</i>          | wild diploid D               |
| TA2529                        | <i>Aegilops tauschii var.meyeri</i>            | wild diploid D               |
| CLAE1                         | <i>Aegilops tauschii</i>                       | wild diploid D               |
| CLAE5                         | <i>Aegilops tauschii</i>                       | wild diploid D               |
| CLAE17                        | <i>Aegilops tauschii</i>                       | wild diploid D               |
| CLAE25                        | <i>Aegilops tauschii</i>                       | wild diploid D               |
| PI 268210                     | <i>Aegilops tauschii</i>                       | wild diploid D               |
| RL5214                        | <i>Aegilops tauschii</i>                       | wild diploid D               |
| RL5257                        | <i>Aegilops tauschii</i>                       | wild diploid D               |
| RL5261                        | <i>Aegilops tauschii</i>                       | wild diploid D               |
| RL5263                        | <i>Aegilops tauschii</i>                       | wild diploid D               |
| RL5272                        | <i>Aegilops tauschii</i>                       | wild diploid D               |
| RL5392                        | <i>Aegilops tauschii</i>                       | wild diploid D               |
| RL5422                        | <i>Aegilops tauschii</i>                       | wild diploid D               |
| Y221                          | <i>Aegilops tauschii ssp.Stran gulata Eig.</i> | wild diploid D               |
| Y222                          | <i>Aegilops tauschii ssp.strangulata EIG.</i>  | wild diploid D               |
| Y293                          | <i>Aegilops tauschii ssp.meyeri GRISEB.</i>    | wild diploid D               |
| Y294                          | <i>Aegilops tauschii ssp.meyeri GRISEB.</i>    | wild diploid D               |
| Y296                          | <i>Aegilops tauschii ssp.strangulata EIG.</i>  | wild diploid D               |
| sankecun                      | <i>Triticum asetivum</i>                       | landrace                     |
| zijuhong                      | <i>Triticum asetivum</i>                       | landrace                     |
| lanxizaoxiaomai               | <i>Triticum asetivum</i>                       | landrace                     |
| heshangmai                    | <i>Triticum asetivum</i>                       | landrace                     |
| hongmangyouzimai              | <i>Triticum asetivum</i>                       | landrace                     |
| tumangmai                     | <i>Triticum asetivum</i>                       | landrace                     |
| jiyumai                       | <i>Triticum asetivum</i>                       | landrace                     |
| changmangyingkema             | <i>Triticum asetivum</i>                       | landrace                     |
| nuomai                        | <i>Triticum asetivum</i>                       | landrace                     |
| wuxumai                       | <i>Triticum asetivum</i>                       | landrace                     |
| baihuamai                     | <i>Triticum asetivum</i>                       | landrace                     |

|                      |                          |                 |
|----------------------|--------------------------|-----------------|
| dahongmai            | <i>Triticum aestivum</i> | landrace        |
| xinganxiaomai        | <i>Triticum aestivum</i> | landrace        |
| sanyuehuang          | <i>Triticum aestivum</i> | landrace        |
| dabaimai             | <i>Triticum aestivum</i> | landrace        |
| huangguaxian         | <i>Triticum aestivum</i> | landrace        |
| baiyoumai            | <i>Triticum aestivum</i> | landrace        |
| huajiechangbaican    | <i>Triticum aestivum</i> | landrace        |
| sanyuanmai           | <i>Triticum aestivum</i> | landrace        |
| shanmai              | <i>Triticum aestivum</i> | landrace        |
| sifangmai            | <i>Triticum aestivum</i> | landrace        |
| tuotuomai            | <i>Triticum aestivum</i> | landrace        |
| yangmai              | <i>Triticum aestivum</i> | landrace        |
| qigongmai            | <i>Triticum aestivum</i> | landrace        |
| chiyacao             | <i>Triticum aestivum</i> | landrace        |
| changgongfangxingmai | <i>Triticum aestivum</i> | landrace        |
| yunnanxiaomai (YN3)  | <i>Triticum aestivum</i> | landrace        |
| paozimai             | <i>Triticum aestivum</i> | landrace        |
| bainong 791          | <i>Triticum aestivum</i> | cultivated line |
| chuanmai 22          | <i>Triticum aestivum</i> | cultivated line |
| chuanmai 42          | <i>Triticum aestivum</i> | cultivated line |
| fengkang 7           | <i>Triticum aestivum</i> | cultivated line |
| jinan 16             | <i>Triticum aestivum</i> | cultivated line |
| jinan 4              | <i>Triticum aestivum</i> | cultivated line |
| jinan 8              | <i>Triticum aestivum</i> | cultivated line |
| jimai 23             | <i>Triticum aestivum</i> | cultivated line |
| jingnong 79-13       | <i>Triticum aestivum</i> | cultivated line |
| kefeng 6             | <i>Triticum aestivum</i> | cultivated line |
| kehan 10             | <i>Triticum aestivum</i> | cultivated line |
| liaochun 9           | <i>Triticum aestivum</i> | cultivated line |
| longmai 33           | <i>Triticum aestivum</i> | cultivated line |
| lumai 3              | <i>Triticum aestivum</i> | cultivated line |
| mianyang 29          | <i>Triticum aestivum</i> | cultivated line |
| neimai 19            | <i>Triticum aestivum</i> | cultivated line |
| ningmai 13           | <i>Triticum aestivum</i> | cultivated line |
| nongda 36            | <i>Triticum aestivum</i> | cultivated line |
| shanhe 6             | <i>Triticum aestivum</i> | cultivated line |
| shannong 1           | <i>Triticum aestivum</i> | cultivated line |
| shijiazhuang 407     | <i>Triticum aestivum</i> | cultivated line |
| wanmai 50            | <i>Triticum aestivum</i> | cultivated line |
| xibei 612            | <i>Triticum aestivum</i> | cultivated line |
| xiannong 39          | <i>Triticum aestivum</i> | cultivated line |
| xiaoyan 4            | <i>Triticum aestivum</i> | cultivated line |
| xiaoyan 759          | <i>Triticum aestivum</i> | cultivated line |

---

**Supplementary Table 3.** Primers used in map-based cloning and RT-qPCR

| primer name       | sequence 5' – 3'         | type      |
|-------------------|--------------------------|-----------|
| M1-Forward        | GGTATGCTCCTCATTTATTCC    | SSR       |
| M1-Reverse        | GACTAGTTCATCTTGCATTCAC   |           |
| M2-Forward        | TAGTATTTGAGAGAGAGGAGCTG  | SSR       |
| M2-Reverse        | TTTTGTTCGTCCTGATCTGA     |           |
| M3-Forward        | TCGGATCCTTCACTGATGTGCT   | SNP       |
| M3-Reverse        | TCCTGGCAAGTCTGCATCTTCA   |           |
| M4-Forward        | TGCACTTTAGAGCTCTGCACCA   | SNP       |
| M4-Reverse        | GGTGAGTGTGTGTGTTTGTGAGCA |           |
| M5-Forward        | TTGGCTTGCCATTGCCATCGTC   | SNP       |
| M5-Reverse        | CAAACCTTGCAGCCTCAACTTG   |           |
| M6-Forward        | AGGGTGAGTAAGATCGTCAGCA   | SNP       |
| M6-Reverse        | GAAGTACTGATTGATGTGAGGAC  |           |
| M7-Forward        | GGCGTCCTCGTCTCCCAATA     | Insertion |
| M7-Reverse        | CGATGATGAACTCACCTGCTGTA  |           |
| M8-Forward        | CCATACGAAAGCATAGCAATA    | SSR       |
| M8-Reverse        | GTGATTGTGAGCAGTCCATT     |           |
| M9-Forward        | CCACAAAATCAATGGTTTCTA    | SSR       |
| M9-Reverse        | AACATTTTTAGACGTTTGACG    |           |
| M10-Forward       | GGAGGCATAATGGAGAATG      | SSR       |
| M10-Reverse       | CGTCTGTTTTCTCTCTCATCA    |           |
| M11-Forward       | CTTACATGCAGATCCGTCTAAT   | SSR       |
| M11-Reverse       | ATTTGTGTGTGTGTCTCTCTCT   |           |
| TaGAPDH-Forward   | TTAGACTTGCGAAGCCAGCA     |           |
| TaGAPDH-Reverse   | AAATGCCCTTGAGGTTTCCC     |           |
| TaTUBULIN-Forward | TGAGGACTGGTGCTTACCGC     |           |
| TaTUBULIN-Reverse | GCACCATCAAACCTCAGGGA     |           |
| Ms2-RT-Forward    | CTGCTGCATCCGACTAACTATC   |           |
| Ms2-RT-Reverse    | TGAGAATACTGTCCACCAAACCTC |           |
